# Supplementary material
Source: PubMed Central journal article supplement (PMC7481667)
Supplement: rsta20190369supp1.pdf [file rsta20190369supp1.pdf]

### Climate change and diminishing seasonality in Arctic benthic processes

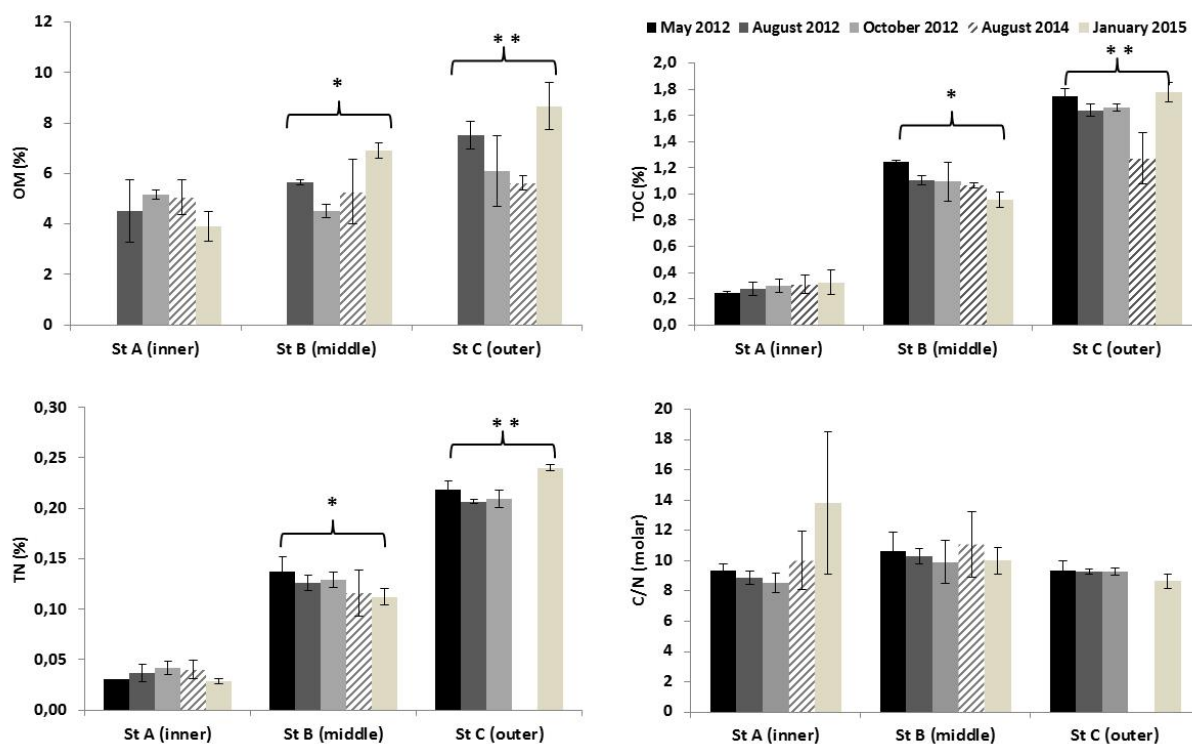

**Supplementary Figure 1:** Mean content (%) of organic matter (OM), Total organic carbon (TOC), Total Nitrogen (TN) and mean ratios of TOC/TN (mol:mol) over the 2 first cm of sediment ( $\pm$  SD) at the three stations in Kongsfjorden, Svalbard (Inner (A), Middle (B), Outer (C)) in 2012 (May, August, October), 2014 (August) and 2015 (January). Significant differences among stations ( $p < 0.05$ ) are indicated by asterisk (\*).

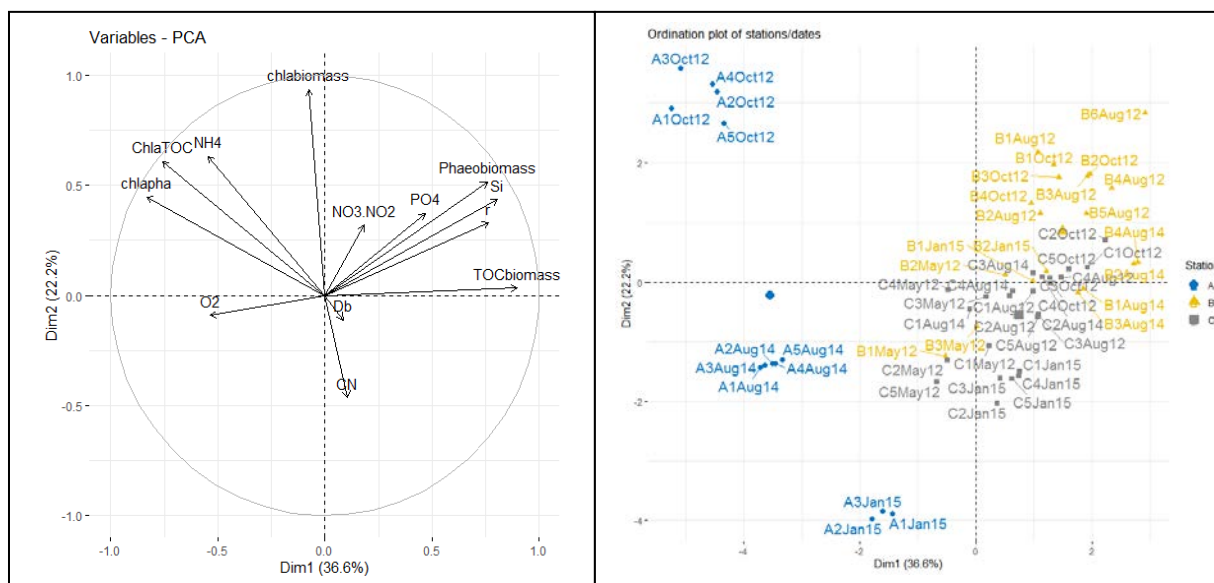

**Supplementary Figure 2:** Principal component analysis based on the sediment variables (C:N, Chla:phaeo and C-Chla: TOC ratios, biomass of TOC, Chla and Phaeo pigments), benthic fluxes (oxygen, ammonium ( $\text{NH}_4^+$ ), nitrate+nitrite ( $\text{NO}_3^- + \text{NO}_2^-$ ), phosphate ( $\text{PO}_4^{3-}$ ), silicate ( $\text{Si}(\text{OH})_4$ ), and bioturbation coefficients (biodiffusion, Db and bioadvection, r) along the Kongsfjord area between 2012 and 2015. Loadings of environmental and biological/biogeochemical variables are shown in the left panel, and station/dates are shown on the ordination plot in the right panel.

Supplementary material for [N. Morata, E. Michaud, MA Poullaouec, J.Devesa, M. Le Goff, R Corvaisier, P.E. Renaud], [2020 submitted special issue – Arctic Change], [Climate change and diminishing seasonality in Arctic benthic processes], *Phil. Trans. R. Soc. A*. doi: 10.1098/rsta.[paper ID in form xxxx.xxxx e.g. 10.1098/rsta.2014.0049]

| sampling time | station | OM (%) | TOC (%) | TN (%) | TOC:TN | TOC biom (mg m <sup>-2</sup> ) | Chla biom (mg m <sup>-2</sup> ) | Phaeo biom (mg m <sup>-2</sup> ) | Chla:Phaeo | C-chla:TOC |
|---------------|---------|--------|---------|--------|--------|--------------------------------|---------------------------------|----------------------------------|------------|------------|
| May 2012      | A       | nd     | 0,23    | 0,03   | 9,04   | 136,58                         | 71,06                           | 103,56                           | 0,68       | 4,96       |
| May 2012      | A       | nd     | 0,25    | 0,03   | 9,65   | nd                             | nd                              | nd                               | nd         | nd         |
| May 2012      | B       | nd     | 1,24    | 0,15   | 9,78   | 319,5                          | 26,51                           | 145,27                           | 0,19       | 0,84       |
| May 2012      | B       | nd     | 1,26    | 0,13   | 11,52  | 351,5                          | 26,68                           | 148,45                           | 0,18       | 0,77       |
| May 2012      | C       | nd     | 1,75    | 0,23   | 9,07   | 332,72                         | 30,1                            | 107,11                           | 0,34       | 0,93       |
| May 2012      | C       | nd     | 1,69    | 0,22   | 8,86   | 336,27                         | 25,38                           | 130,47                           | 0,2        | 0,76       |
| May 2012      | C       | nd     | 1,81    | 0,21   | 10,11  | 387,29                         | 25,75                           | 136,23                           | 0,19       | 0,7        |
| Aug 2012      | A       | 5,86   | 0,27    | 0,04   | 8,77   | 68,62                          | 55,34                           | 76,09                            | 0,46       | 6,57       |
| Aug 2012      | A       | 4,28   | 0,22    | 0,03   | 9,36   | 58,61                          | nd                              | nd                               | nd         | nd         |
| Aug 2012      | A       | 3,42   | 0,32    | 0,05   | 8,45   | 87,86                          | 66,47                           | 98,07                            | 0,6        | 6,63       |
| Aug 2012      | B       | 5,69   | 1,14    | 0,13   | 10,51  | 371,81                         | 36,73                           | 187,55                           | 0,2        | 1          |
| Aug 2012      | B       | 5,7    | 1,07    | 0,12   | 10,65  | 333,06                         | 35,88                           | 160,81                           | 0,22       | 1,11       |
| Aug 2012      | B       | 5,55   | 1,1     | 0,13   | 9,69   | 307,59                         | 35,21                           | 164,04                           | 0,22       | 1,16       |
| Aug 2012      | C       | 7,31   | 1,65    | 0,21   | 9,26   | 336,9                          | 20,84                           | 116,6                            | 0,18       | 0,63       |
| Aug 2012      | C       | 7,1    | 1,59    | 0,2    | 9,11   | 357,53                         | 21,26                           | 142,9                            | 0,15       | 0,6        |
| Aug 2012      | C       | 8,15   | 1,68    | 0,21   | 9,45   | 365,65                         | 22,35                           | 112,84                           | 0,2        | 0,61       |
| octb 2012     | A       | 5      | 0,29    | 0,04   | 7,99   | 77,82                          | 5,94                            | 48,41                            | 0,12       | 0,86       |
| octb 2012     | A       | 5,09   | 0,35    | 0,05   | 8,4    | 96,83                          | 83,56                           | 132,45                           | 0,47       | 6,75       |
| octb 2012     | A       | 5,35   | 0,25    | 0,03   | 9,22   | 67,25                          | 45,23                           | 79,69                            | 0,51       | 5,96       |
| octb 2012     | B       | 4,28   | 0,97    | 0,12   | 9,21   | 294,23                         | 32,5                            | 156,97                           | 0,21       | 1,11       |
| octb 2012     | B       | 4,45   | 1,06    | 0,14   | 8,99   | 319,31                         | 38,69                           | 162,87                           | 0,24       | 1,21       |
| octb 2012     | B       | 4,8    | 1,26    | 0,13   | 11,54  | 360,29                         | 31,6                            | 152,31                           | 0,21       | 0,9        |
| octb 2012     | C       | 7,08   | 1,68    | 0,22   | 9,13   | 326,43                         | 24,76                           | 123,75                           | 0,2        | 0,75       |
| octb 2013     | C       | 5,11   | 1,64    | 0,2    | 9,43   | 375,37                         | 23,61                           | 137,47                           | 0,17       | 0,63       |
| Aug 2014      | A       | 4,26   | 0,24    | 0,04   | 8,02   | 72,39                          | 21,57                           | 54,01                            | 0,37       | 2,51       |
| Aug 2014      | A       | 5,31   | 0,37    | 0,05   | 10,15  | 90,67                          | 11,01                           | 30,55                            | 0,34       | 1,16       |
| Aug 2014      | A       | 5,56   | 0,32    | 0,03   | 11,89  | 96,32                          | 13,65                           | 45,53                            | 0,26       | 1,31       |
| Aug 2014      | B       | 6,01   | 1,05    | 0,09   | 13,58  | 326,46                         | 27,36                           | 138,6                            | 0,2        | 0,86       |
| Aug 2014      | B       | 6,03   | 1,06    | 0,13   | 9,67   | 324,11                         | 23,21                           | 151,63                           | 0,15       | 0,72       |
| Aug 2014      | B       | 3,81   | 1,09    | 0,13   | 9,96   | 435,12                         | 26,8                            | 180,43                           | 0,15       | 0,62       |
| Aug 2014      | C       | nan    | 1,48    | 0,21   | 8,45   | 392,78                         | 27,64                           | 139,05                           | 0,2        | 0,71       |
| Aug 2014      | C       | 5,84   | 1,25    | 0,19   | 7,77   | 317,97                         | 24,38                           | 119,2                            | 0,2        | 0,79       |
| Aug 2014      | C       | 5,43   | 1,09    | nd     | nd     | 298,47                         | 24,3                            | 130,86                           | 0,18       | 0,8        |
| Jan 2015      | A       | 4,58   | 0,43    | 0,03   | 19,05  | 142,15                         | 6,99                            | 43,61                            | 0,17       | 0,53       |
| Jan 2015      | A       | 3,57   | 0,24    | 0,03   | 9,85   | 81,63                          | 5,81                            | 39,14                            | 0,16       | 0,71       |
| Jan 2015      | A       | 3,56   | 0,3     | 0,03   | 12,54  | 88,32                          | nd                              | nd                               | nd         | nd         |
| Jan 2015      | B       | 6,57   | 0,97    | 0,1    | 10,95  | 215,74                         | 22,01                           | 108,06                           | 0,2        | 1,01       |
| Jan 2015      | B       | 7,08   | 1,01    | 0,12   | 9,85   | 331,79                         | 29,67                           | 164,11                           | 0,19       | 0,9        |
| Jan 2015      | B       | 7,1    | 0,89    | 0,11   | 9,23   | 247,78                         | nd                              | nd                               | nd         | nd         |
| Jan 2015      | C       | 8,14   | 1,87    | 0,24   | 9,22   | 340,79                         | 16,31                           | 84,24                            | 0,19       | 0,48       |
| Jan 2015      | C       | 9,75   | 1,72    | 0,24   | 8,31   | 313                            | 10,29                           | 77,57                            | 0,13       | 0,31       |
| Jan 2015      | C       | 8,12   | 1,75    | 0,24   | 8,41   | 331,67                         | 12,3                            | 94,66                            | 0,13       | 0,33       |

**Dataset 1** : Data archive from bulk sediment variables that were used for the figures 2, 5, the tables 1, 2 and the supplementary figure 1. Sedimentary content (%) in organic matter (OM), total organic carbon (TOC), total Nitrogen (TN) and mean ratios of TOC:TN (mol:mol), biomass (mg m<sup>-2</sup>) of TOC, Chla, Phaeo, and mean ratios of chla:phaeo (d) and C-Chla:TOC (%) over the 2 first cm of sediment in each sampled core at the three stations in Kongsfjorden, Svalbard (Inner (A), Middle (B), Outer (C)) in 2012 (May, August, October), 2014 (August) and 2015 (January). (nd means no data).

| sampled time | station | Db                                 | r                  | O <sub>2</sub>                          | NO <sub>3</sub> <sup>-</sup> +NO <sub>2</sub> <sup>-</sup> | Si(OH) <sub>4</sub>                     | NH <sub>4</sub> <sup>+</sup>            | PO <sub>4</sub> <sup>3-</sup>           |
|--------------|---------|------------------------------------|--------------------|-----------------------------------------|------------------------------------------------------------|-----------------------------------------|-----------------------------------------|-----------------------------------------|
|              |         | (cm <sup>2</sup> y <sup>-1</sup> ) | (y <sup>-1</sup> ) | (mmol m <sup>-2</sup> d <sup>-1</sup> ) | (mmol m <sup>-2</sup> d <sup>-1</sup> )                    | (mmol m <sup>-2</sup> d <sup>-1</sup> ) | (mmol m <sup>-2</sup> d <sup>-1</sup> ) | (mmol m <sup>-2</sup> d <sup>-1</sup> ) |
| May 2012     | B       | 1,8                                | 0                  | -8,63                                   | -0,75                                                      | 0,82                                    | 0,2                                     | -0,01                                   |
| May 2012     | B       | 2,35                               | 0                  | -8,88                                   | -0,14                                                      | 1,02                                    | 0,21                                    | 0,1                                     |
| May 2012     | B       | nd                                 | nd                 | -5,55                                   | -0,01                                                      | 0,4                                     | 0                                       | -0,02                                   |
| May 2012     | C       | 4,35                               | 0                  | -9,35                                   | 0,47                                                       | 0,32                                    | -0,29                                   | -0,04                                   |
| May 2012     | C       | 2,05                               | 0                  | -9,32                                   | -0,07                                                      | 0,08                                    | -0,16                                   | -0,04                                   |
| May 2012     | C       | nd                                 | nd                 | -10,87                                  | 0,03                                                       | 0,45                                    | -0,03                                   | -0,02                                   |
| May 2012     | C       | 2,9                                | 0                  | -8,14                                   | -0,19                                                      | 0,8                                     | 0,18                                    | 0,03                                    |
| May 2012     | C       | 2,5                                | 0                  | -7,94                                   | -0,15                                                      | -0,16                                   | -0,21                                   | -0,04                                   |
| Aug 2012     | B       | 0,15                               | 8,8                | -7,08                                   | 0,27                                                       | 1,26                                    | 0,3                                     | 0,01                                    |
| Aug 2012     | B       | nd                                 | nd                 | -10,19                                  | -0,03                                                      | 1,95                                    | 0,12                                    | -0,03                                   |
| Aug 2012     | B       | 0,02                               | 5,56               | -14,32                                  | 0,19                                                       | 1,97                                    | 0,11                                    | 0,01                                    |
| Aug 2012     | B       | 0                                  | 6,5                | -14,29                                  | 0,03                                                       | 1,94                                    | -0,01                                   | 0,05                                    |
| Aug 2012     | B       | 1,8                                | 6,4                | -12,15                                  | 0,14                                                       | 2,45                                    | 0,01                                    | -0,06                                   |
| Aug 2012     | B       | nd                                 | nd                 | -10,65                                  | 0,06                                                       | 2,08                                    | 0,11                                    | 0,23                                    |
| Aug 2012     | C       | 0                                  | 4                  | -6,7                                    | 0,04                                                       | 1,29                                    | 0,08                                    | 0                                       |
| Aug 2012     | C       | 0,05                               | 4,8                | -7,43                                   | 0,02                                                       | 1,66                                    | 0,04                                    | 0                                       |
| Aug 2012     | C       | 0,1                                | 5,6                | -5,48                                   | 0,04                                                       | 1,35                                    | -0,12                                   | 0,01                                    |
| Aug 2012     | C       | nd                                 | nd                 | -11,73                                  | -0,14                                                      | 2,11                                    | 0,11                                    | 0,01                                    |
| Aug 2012     | C       | nd                                 | nd                 | -9,61                                   | 0,02                                                       | 1,19                                    | -0,06                                   | 0                                       |
| octb 2012    | A       | 0                                  | 0,3                | -5,64                                   | 0,09                                                       | -0,48                                   | 0,4                                     | -0,01                                   |
| octb 2012    | A       | 0,05                               | 0,6                | -9,82                                   | 0,05                                                       | 0,39                                    | 0,4                                     | -0,02                                   |
| octb 2012    | A       | 0                                  | 0,5                | -6,21                                   | 0,02                                                       | 0,4                                     | 0,59                                    | -0,01                                   |
| octb 2012    | A       | 0                                  | 0,5                | -9,11                                   | 0,03                                                       | 0,46                                    | 0,44                                    | -0,01                                   |
| octb 2012    | A       | 0                                  | 0,25               | -5,7                                    | 0,22                                                       | 0,34                                    | 0,12                                    | -0,01                                   |
| octb 2012    | B       | 0,05                               | 5,6                | -8,01                                   | 0,17                                                       | 2,24                                    | 0,16                                    | 0,05                                    |
| octb 2012    | B       | 0,1                                | 6                  | -10,8                                   | 0,23                                                       | 2,45                                    | 0,02                                    | 0,04                                    |
| octb 2012    | B       | nd                                 | nd                 | -6,79                                   | 0,36                                                       | 2,03                                    | 0,03                                    | 0,05                                    |
| octb 2012    | B       | 0                                  | 3,75               | -6,87                                   | 0,13                                                       | 1,92                                    | 0,04                                    | 0,04                                    |
| octb 2012    | C       | 0,25                               | 9,25               | -7,77                                   | 0,03                                                       | 1,61                                    | -0,1                                    | 0,03                                    |
| octb 2012    | C       | 0                                  | 8,4                | -11,81                                  | 0,11                                                       | 2,17                                    | 0                                       | 0,01                                    |
| octb 2012    | C       | 0                                  | 5,4                | -8,85                                   | 0,03                                                       | 1,45                                    | -0,03                                   | 0,02                                    |
| octb 2012    | C       | nd                                 | nd                 | -8,4                                    | 0,05                                                       | 1,64                                    | -0,06                                   | 0,02                                    |
| octb 2012    | C       | nd                                 | nd                 | -10,17                                  | 0,12                                                       | 1,69                                    | -0,05                                   | 0,03                                    |
| Jan 2013     | B       | nd                                 | nd                 | -5,91                                   | nd                                                         | nd                                      | nd                                      | nd                                      |
| Jan 2013     | B       | nd                                 | nd                 | -9,44                                   | nd                                                         | nd                                      | nd                                      | nd                                      |
| Jan 2013     | B       | nd                                 | nd                 | -7,22                                   | nd                                                         | nd                                      | nd                                      | nd                                      |
| Jan 2013     | B       | nd                                 | nd                 | -10,37                                  | nd                                                         | nd                                      | nd                                      | nd                                      |
| Jan 2013     | C       | nd                                 | nd                 | -8,48                                   | nd                                                         | nd                                      | nd                                      | nd                                      |
| Jan 2013     | C       | nd                                 | nd                 | -8,65                                   | nd                                                         | nd                                      | nd                                      | nd                                      |
| Jan 2013     | C       | nd                                 | nd                 | -9,1                                    | nd                                                         | nd                                      | nd                                      | nd                                      |
| Jan 2013     | C       | nd                                 | nd                 | -7,43                                   | nd                                                         | nd                                      | nd                                      | nd                                      |
| Jan 2013     | C       | nd                                 | nd                 | -9,45                                   | nd                                                         | nd                                      | nd                                      | nd                                      |
| Aug 2014     | A       | 0                                  | 0,6                | -6,19                                   | nd                                                         | nd                                      | nd                                      | nd                                      |
| Aug 2014     | A       | 0                                  | 0,7                | -7,69                                   | nd                                                         | nd                                      | nd                                      | nd                                      |
| Aug 2014     | A       | 0                                  | 0,9                | -6,35                                   | nd                                                         | nd                                      | nd                                      | nd                                      |
| Aug 2014     | A       | 0                                  | 0,5                | -8,42                                   | nd                                                         | nd                                      | nd                                      | nd                                      |
| Aug 2014     | A       | 0                                  | 1                  | -8,65                                   | nd                                                         | nd                                      | nd                                      | nd                                      |
| Aug 2014     | B       | 0                                  | 4                  | -11,84                                  | nd                                                         | nd                                      | nd                                      | nd                                      |
| Aug 2014     | B       | 0                                  | 6,8                | -14,8                                   | nd                                                         | nd                                      | nd                                      | nd                                      |
| Aug 2014     | B       | 0,25                               | 3,85               | -11,2                                   | nd                                                         | nd                                      | nd                                      | nd                                      |
| Aug 2014     | B       | 0                                  | 7                  | -15,1                                   | nd                                                         | nd                                      | nd                                      | nd                                      |
| Aug 2014     | C       | 0                                  | 1,65               | -5,4                                    | nd                                                         | nd                                      | nd                                      | nd                                      |
| Aug 2014     | C       | 0                                  | 4,25               | -11,67                                  | nd                                                         | nd                                      | nd                                      | nd                                      |
| Aug 2014     | C       | 0,1                                | 6,3                | -7,53                                   | nd                                                         | nd                                      | nd                                      | nd                                      |
| Aug 2014     | C       | nd                                 | nd                 | -7,83                                   | nd                                                         | nd                                      | nd                                      | nd                                      |
| Jan 2015     | A       | 0                                  | 0,7                | -8,8                                    | -0,05                                                      | 0,17                                    | -0,05                                   | -0,01                                   |
| Jan 2015     | A       | 0                                  | 0,7                | -5,81                                   | -0,02                                                      | 0,13                                    | -0,05                                   | -0,02                                   |
| Jan 2015     | A       | 0                                  | 0,25               | -7,59                                   | 0,02                                                       | 0,14                                    | -0,04                                   | -0,01                                   |
| Jan 2015     | B       | 0,05                               | 5                  | -13,41                                  | 0,03                                                       | 0,93                                    | 0                                       | 0,01                                    |
| Jan 2015     | B       | 1,3                                | 7,5                | -11,96                                  | 0,03                                                       | 1,28                                    | 0,04                                    | -0,01                                   |
| Jan 2015     | C       | 0                                  | 3,65               | -10,77                                  | 0,09                                                       | 0,83                                    | -0,07                                   | -0,01                                   |
| Jan 2015     | C       | 0                                  | 2                  | -10,48                                  | 0,03                                                       | 0,47                                    | -0,14                                   | -0,02                                   |
| Jan 2015     | C       | 0,1                                | 5,2                | -6,99                                   | 0,19                                                       | 0,23                                    | -0,1                                    | -0,01                                   |
| Jan 2015     | C       | 0                                  | 1,75               | -13,44                                  | 0,06                                                       | 0,86                                    | -0,06                                   | -0,01                                   |
| Jan 2015     | C       | 0                                  | 2,5                | -11,28                                  | 0,01                                                       | 0,65                                    | -0,07                                   | 0,01                                    |

**Dataset 2** : Data archive from sediment cores incubations that were used for the figures 3, 5, the tables 1, 2 and the supplementary figure 2. Biodiffusion (Db in cm<sup>2</sup> y<sup>-1</sup>) and non-local (r in y<sup>-1</sup>) transports, oxygen and nutrients net fluxes (mmol m<sup>-2</sup> d<sup>-1</sup>) at the sediment-water interfaces in each sampled core at the three stations in Kongsfjorden, Svalbard (Inner (A), Middle (B), Outer (C)) between 2012 and 2015. (nd means no data).
